# Supplementary material for: Rhizosphere community selection reveals bacteria associated with reduced root disease
Source: Microbiome. 2021 Apr 9;9:86. doi: 10.1186/s40168-020-00997-5 (PMC8035742; doi:10.1186/s40168-020-00997-5)
Supplement: Supplementary file 5 — Additional file 4: Table S3. The suppression activity of Janthinobaterium against Rhizoctonia solani AG8 in greenhouse assay (replicates 2 and 3). [file 40168_2020_997_MOESM5_ESM.xlsx]

## Sheet: Sheet1
Table S3 The suppression activity of Janthinobaterium against Rhizoctonia solani AG8 in greenhouse assay (replicates 2 and 3)
Treatment	Rep2			Rep3
	Wheat root fresh weigh (g)	Wheat shoot fresh weight (g)	Wheat shoot length (cm)	Wheat root fresh weigh (g)	Wheat shoot fresh weight (g)	Wheat shoot length (cm)
- AG8 - Janthinobacterium	324.58±53.69 a	824.02±44.98 a	22.86±0.55 a	342.92±25.69 a	887.40±29.30 a	20.82±0.62 a
- AG8 + seed treated with Janthinobacterium	354.12±13.65 a	882.58±31.75 a	21.38±0.42 a	352.30±21.65 a	790.75±23.78 a	20.12±0.67 a
+ AG8 only	129.48±19.91 c	314.70±41.01 b	15.36±0.52 b	105.62±8.65 c	338.67±47.35 b	15.47±1.01 b
+ AG8 + seed treated with Janthinobacterium	167.93±9.23 bc	367.82±21.67 b	16.39±0.53 b	184.38±17.57 b	525.28±53.95 b	17.28±0.29 b
‘+’: with, ‘-’: without. The values are means ± standard error of six replicates. Different letters indicate significant differences (p ≤ 0.05, Tukey test).
